# Supplementary material
Source: MDPI journal article supplement (https://www.mdpi.com/2076-3417/12/19/9895)
Supplement: s1 [file s1]

**Table S2:** Sequences of *P. larvae* 16S rRNA gene from GenBank used to design the TaqMan® Real-Time PCR primers and probe used in the present work

| GenBank Accession Number | <i>Paenibacillus larvae</i> strains | Provenience |
|--------------------------|-------------------------------------|-------------|
| X60636                   | NCDO 1141                           | UK          |
| AY530294                 | DSM 7030*                           | GERMANY     |
| AY530295                 | DSM 3615#                           | GERMANY     |
| DQ079620                 | DSM 16116§                          | GERMANY     |
| DQ079621                 | 00-1163                             | GERMANY     |
| AY030080                 | ATCC 49843#                         | ITALY       |
| EF415646                 | PLP                                 | URUGUAY     |
| AY030079                 | NRRL B-3555                         | ITALY       |
| EF415644                 | A                                   | URUGUAY     |
| EF415645                 | B                                   | URUGUAY     |
| EF415643                 | C                                   | URUGUAY     |
| AB073205                 | DSM 7030*                           | JAPAN       |
| EF187246                 | YMB1                                | SWEDEN      |
| X60619                   | ATCC 9545*                          | UK          |
| DQ079622                 | 02-130                              | GERMANY     |
| DQ079623                 | 03-189                              | GERMANY     |
| CP019652                 | ATCC DSM 25430 §                    | GERMANY     |

\*Genotype ERIC I

§ Genotype ERIC II

# Genotype ERIC IV
