# Supplementary material
Source: MDPI journal article supplement (https://www.mdpi.com/2076-3417/12/19/9895)
Supplement: s1 [file s1]

**Table S1:** Primers and probe of the TaqMan® Real-Time PCR used in the present work

| Oligo        | Sequence 5' – 3'                         | Position |
|--------------|------------------------------------------|----------|
| PL_FOR_76_19 | GTTTCYTTCGGGAGACGC C                     | 71-89*   |
| PL_FOR_76_20 | GTT TCT CTT CGG GAG ACG CC               | 70-89§   |
| PL_REV-195   | TGA CTT CTT CAT GCG AAG AAA C            | 181-202* |
| PL_PROBE     | FAM - TAAGACCGGGATAACTTGCGGAAACGTG –BHQ1 | 134-158* |

\*Numbering is from the sequence of *Paenibacillus larvae* ATCC 9545 (accession number: X60619)

§ Numbering is from the sequence of *Paenibacillus larvae* DSM7030 (accession number: AY530294)
