# Supplementary material
Source: MDPI journal article supplement (https://www.mdpi.com/2076-3417/12/19/9895)
Supplement: s1 [file s1 › Table S3.pdf]

**Table S3:** 16S rRNA gene sequences from GenBank of Bacterial contaminants evaluated to design the TaqMan® Real-Time PCR primers and probe used in the present work

| <b>Hive Bacterial Contaminants</b> | <b>GenBank Accession Number of 16S rRNA gene sequences</b> |
|------------------------------------|------------------------------------------------------------|
| Paenibacillus sp.                  | AM162298                                                   |
| Paenibacillus alvei                | AY862508                                                   |
| Paenibacillus alvei                | NR_042091                                                  |
| Paenibacillus thiaminolyticus      | FJ538210                                                   |
| Bacillus kribbensis                | NR_025169                                                  |
| Paenibacillus amylolyticus         | AM237394                                                   |
| Paenibacillus azotofixans          | AJ251192                                                   |
| Paenibacillus                      | EF381743                                                   |
| Bacillus thuringiensis             | FJ686830                                                   |
| Bacillus cereus                    | FY686826                                                   |
| Bacillus fusiformis                | AY548956                                                   |
| Lysinibacillus sphaericus          | GU129144                                                   |
| Bacillus licheniformis             | NR 074923.1                                                |
| Bacillus subtilis                  | EF308641                                                   |
| Bacillus pumilus                   | AY548955                                                   |
| Bacillus megaterium                | GQ911553                                                   |
| Bacillus circulans                 | GQ385067                                                   |
| Brevibacillus laterosporus         | EU221377                                                   |
| Brevibacillus brevis               | GQ375794                                                   |
| Paenibacillus apiarius             | PAU49247                                                   |
| Enterococcus faecalis              | FJ608830                                                   |
| Bacillus sphaericus                | GU129144                                                   |
