# Supplementary material
Source: MDPI journal article supplement (https://www.mdpi.com/2076-3417/12/19/9895)
Supplement: s1 [file s1 › Table S4.pdf]

**Table S4** – Results in details obtained from the examination of the powdered sugar samples by microbiological and molecular methods from all apiaries. Samples of the same apiary are depicted in the same color. The ERIC genotype of the strains isolated from the samples are reported in the legend below.

| N                             | CFU /1g | Spore /1g | N  | CFU /1g    | Spore /1g   | N  | CFU /1g    | Spore /1g   | N  | CFU /1g | Spore /1g | N  | CFU /1g | Spore/ 1g  |
|-------------------------------|---------|-----------|----|------------|-------------|----|------------|-------------|----|---------|-----------|----|---------|------------|
| <b>Group A (sub-group A1)</b> |         |           |    |            |             |    |            |             |    |         |           |    |         |            |
| 1                             | 304.000 | 580.000   | 2  | 200.000    | 1.336.000   | 3  | 4.440.000  | 6.800.000   | 4  | 54.200  | 254.100   | 5  | 52.800  | 384.200    |
| 6                             | 44.000  | 743.300   | 7  | 3.000.000  | 10.300.000  | 8  | 128.000    | 2.005.400   | 9  | 750.000 | 5.575.000 | 10 | 560.000 | 23.700.000 |
| 11                            | 400.000 | 987.400   | 12 | 11.200.000 | 659.300.000 | 13 | 28.000.000 | 130.200.000 | 14 | 600.000 | 5.570.000 | 15 | 380.000 | 2.200.000  |
| <b>Group A (sub-group A2)</b> |         |           |    |            |             |    |            |             |    |         |           |    |         |            |
| 1                             | 40      | neg       | 10 | <20        | 200         | 19 | 20         | 130         | 28 | 17.980  | 28.700    | 37 | 200     | 621        |
| 2                             | 20      | neg       | 11 | 20         | 24          | 20 | 80         | 500         | 29 | 192     | 800       | 38 | 250     | 13.400     |
| 3                             | 320     | 33.100    | 12 | 20         | neg         | 21 | 460        | 1.800       | 30 | 560     | 200       | 39 | 28      | 164        |
| 4                             | 20      | 65        | 13 | <20        | neg         | 22 | 80         | 75          | 31 | 40      | 160       | 40 | 680     | 3.032      |
| 5                             | 400     | 3.400     | 14 | 40         | 255         | 23 | 100        | 235         | 32 | 562     | 2.755     | 41 | 75      | 833        |
| 6                             | 2.600   | 68.400    | 15 | <20        | 200         | 24 | < 20       | neg         | 33 | 38      | 716       | 42 | 700     | 10.600     |
| 7                             | <20     | neg       | 16 | <20        | neg         | 25 | 220        | 100         | 34 | 63      | 2.606     | 43 | < 20    | 750        |
| 8                             | <20     | 194       | 17 | <20        | 50          | 26 | 2.700      | 4.100       | 35 | 268     | 6.402     | 44 | 180     | 2.220      |
| 9                             | <20     | neg       | 18 | 60         | 130         | 27 | 2.420      | 770         | 36 | < 20    | 620       | 45 | 6.220   | 15.500     |
| <b>Group B</b>                |         |           |    |            |             |    |            |             |    |         |           |    |         |            |
| 1                             | 120     | 40        | 10 | < 20       | neg         | 19 | < 20       | neg         | 28 | < 20    | 30        | 37 | < 20    | neg        |
| 2                             | < 20    | 120       | 11 | < 20       | neg         | 20 | < 20       | neg         | 29 | < 20    | 500       | 38 | < 20    | neg        |
| 3                             | 40      | neg       | 12 | < 20       | 61          | 21 | < 20       | 340         | 30 | < 20    | neg       | 39 | < 20    | neg        |
| 4                             | 20      | 250       | 13 | < 20       | neg         | 22 | 40         | 104         | 31 | < 20    | 140       | 40 | < 20    | neg        |
| 5                             | < 20    | 35        | 14 | < 20       | neg         | 23 | < 20       | neg         | 32 | < 20    | neg       | 41 | < 20    | neg        |
| 6                             | < 20    | 450       | 15 | < 20       | neg         | 24 | 80         | neg         | 33 | < 20    | neg       | 42 | < 20    | neg        |
| 7                             | < 20    | 20        | 16 | 140        | 41          | 25 | 20         | neg         | 34 | < 20    | neg       | 43 | < 20    | neg        |
| 8                             | < 20    | 90        | 17 | < 20       | neg         | 26 | < 20       | 40          | 35 | 80      | 900       | 44 | < 20    | neg        |
| 9                             | < 20    | 270       | 18 | < 20       | neg         | 27 | < 20       | neg         | 36 | < 20    | neg       | 45 | < 20    | neg        |

Legend to Table S4

| APIARIS | GROUP | Number of samples per group / sub-group | Genotype |
|---------|-------|-----------------------------------------|----------|
| I       | A     | 1 (A1); 13 (A2)                         | ERIC I   |
| II      | A     | 1 (A1); 2 (A2)                          | ERIC II  |
| III     | A     | 1 (A1); 16 (A2)                         | ERIC II  |
| IV      | A     | 5 (A1); 11 (A2)                         | ERIC II  |
| V       | A     | 6 (A1); 2 (A2)                          | ERIC II  |
| VI      | A     | 1 (A1); 1 (A2)                          | ERIC II  |
| VII     | B     | 10 (B)                                  | ERIC II  |
| VIII    | B     | 15 (B)                                  | ERIC I   |
| IX      | B     | 10 (B)                                  | ERIC I   |
| X       | B     | 10 (B)                                  |          |
